# Supplementary material for: Shear Bond Strength and Remineralisation Effect of a Casein Phosphopeptide-Amorphous Calcium Phosphate-Modified Glass Ionomer Cement on Artificial “Caries-Affected” Dentine
Source: PubMed Central journal article supplement (PMC5578113; doi:10.3390/ijms18081723), 2017-08-07
Supplement: ijms-18-01723-s001.pdf [file ijms-18-01723-s001.pdf]

## Supplementary Materials

### Accurate measurement of elastic modulus and hardness via a rate-jump method

In this method, the elastic modulus and hardness are evaluated at the onset of an unloading stage. Such an onset point for unloading is a rate-jump point, the true elastic modulus  $S_e$  can be calculated from the data just before and after the unloading point using equation (1) [1],

$$\frac{1}{S_e - K} = \left( \frac{1}{S} - \frac{\dot{h}_h}{\dot{P}_u} \right) \frac{1}{\left( 1 - \frac{\dot{P}_h}{\dot{P}_u} \right)} \quad (1)$$

$$S_e = 2aE_r = \frac{2Ea}{1-\nu^2} = \frac{2Ea}{1-0.3^2} = 2.2Ea \quad (2)$$

where  $S$  is the apparent tip-sample contact stiffness at the onset of unload and equals to  $dP/dh$ ,  $P$  is force and  $h$  is displacement.  $\dot{h}_h$  is the displacement rate just before the unload,  $\dot{P}_h$  and  $\dot{P}_u$  are the loading and unloading rate, respectively.  $K$  is the fitting parameter and equals to zero when the indentation is performed in air condition. Following the Sneddon relation [2,3] we can have equation (2), where  $E_r$  and  $E$  are the reduce modulus and the elastic modulus of the tested materials,  $\nu$  is the poisson ratio, ( $\nu = 0.3$  for glass-ionomer cement, [4]).  $a$  is the radius of the contact area. The contact size  $a$  can be estimated from a pre-calibrated shape function  $f(h_c) = \pi a^2$  of the tip. The contact depth  $h_c$  is obtainable using the Oliver-Pharr relation [5] with the true contact stiffness  $S_e$ , as shown in equation (3).

$$h_c = h_{max} - \varepsilon \frac{P_{max}}{S_e} = h_{max} - 0.75 \frac{P_{max}}{S_e} \quad (3)$$

Where  $h_{max}$  and  $P_{max}$  are the maximum indenter displacement at the onset of unloading and the load before unloading, respectively.  $\varepsilon$  is a constant ( $\varepsilon = 0.75$  for Berkovich tip). And the hardness can be measured by equation (4),

$$H = \frac{P_{max}}{A_c} \quad (4)$$

All the raw data collected from the nanoindenter were read and calculated via Matlab R2014a software. Here we show how the results of one set data were calculated.

#### Sample 1:

Since samples are tested in air testing condition,  $K=0$ ,

$$\frac{1}{S_e} = \left( \frac{1}{S} - \frac{\dot{h}_h}{\dot{P}_u} \right) \frac{1}{\left( 1 - \frac{\dot{P}_h}{\dot{P}_u} \right)} = \left( \frac{1}{17543} - \frac{257.6 \times 10^{-9}}{-9.993 \times 10^{-3}} \right) \frac{1}{\left( 1 - \frac{7.142 \times 10^{-3}}{-9.993 \times 10^{-3}} \right)}$$

The true elastic stiffness  $S_e = 2.1 \times 10^4$  N/m;

$$\text{The contact depth } h_c = h_{max} - 0.75 \frac{P_{max}}{S_e} = 5700 \times 10^{-9} - 0.75 \times \frac{100 \times 10^{-3}}{2.1 \times 10^4} = 2.13 \times 10^{-6} \text{ m}$$

$$\text{The contact size } A_c = 1.11 \times 10^{-10} \text{ m}^2$$

$$\text{The contact radius } a = 5.95 \times 10^{-6} \text{ m}$$

$$\text{The true elastic modulus } E = \frac{S_e}{2.2a} = 1.16 \times 10^9 \text{ Pa} = 1.16 \text{ GPa}$$

$$\text{The hardness } H = \frac{P_{max}}{A_c} = \frac{100 \times 10^{-3}}{1.11 \times 10^{-10}} = 9.01 \times 10^8 \text{ Pa} = 0.9 \text{ GPa}$$

## References

1. Tang, B.; Ngan, A.H.W.; Lu, W.W. An improved method for the measurement of mechanical properties of bone by nanoindentation. *J. Mater. Sci.: Mater. Med.* **2007**, *18*, 1875–1881.
2. Johnson, K.L. *Contact Mechanics*; Cambridge University Press, Cambridge, UK, 1985; p. 93.
3. Sneddon, I.N. The relation between load and penetration in the axisymmetric Boussinesq problem for a punch of arbitrary profile. *Int. J. Eng. Sci.* **1965**, *3*, 47–57.

4. Akinmade, A.O.; Nicholson, J.W. Poisson's ratio of glass-polyalkenoate ("glass-ionomer") cements determined by an ultrasonic pulse method. *J. Mater. Sci: Mater. Med.* **1995**, *6*, 483–485.
5. Oliver, W.C.; Pharr, G.M. An improved technique for determining hardness and elastic modulus using load and displacement sensing indentation experiments. *J. Mater. Res.* **1992**, *7*, 1564–1583.
